# Supplementary material for: Therapeutic miR-21 Silencing Reduces Cardiac Fibrosis and Modulates Inflammatory Response in Chronic Chagas Disease
Source: PubMed Central journal article supplement (PMC8036348; doi:10.3390/ijms22073307), 2021-03-24
Supplement: ijms-22-03307-s001.pdf [file ijms-22-03307-s001.pdf]

**Therapeutic miR-21 silencing reduces cardiac fibrosis and modulates inflammatory response in chronic Chagas disease**

Carolina Kymie Vasques Nonaka<sup>1-3</sup>, Gabriela Louise Sampaio<sup>2,4</sup>, Luciana de Aragão França<sup>1,3</sup>, Bruno Raphael Ribeiro Cavalcante<sup>2</sup>, Katia Nunes Silva<sup>1-3</sup>, Ricardo Khouri<sup>2</sup>, Felipe Guimarães Torres<sup>2</sup>, Cássio Santana Meira<sup>2,4</sup>, Emanuelle de Souza Santos<sup>2,4</sup>, Carolina The Macedo<sup>2,4,5</sup>, Bruno Diaz Paredes<sup>1-3</sup>, Vinicius Pinto Costa Rocha<sup>2,4</sup>, Silvia Regina Rogatto<sup>5</sup>, Ricardo Ribeiro dos Santos<sup>2,4</sup>, Bruno Solano de Freitas Souza<sup>1-3</sup>, Milena Botelho Pereira Soares<sup>2,4\*</sup>

**Supplementary material**

**Table S1. Predicted targets of miR-21-5p sorted by cumulative weighted context++ score by TargetScanHuman**

| Ortholog of target gene | Gene name                                                                                                 | Total context++ score |
|-------------------------|-----------------------------------------------------------------------------------------------------------|-----------------------|
| C1orf143                | chromosome 1 open reading frame 143                                                                       | -0.85                 |
| ZNF367                  | zinc finger protein 367                                                                                   | -0.72                 |
| KHDC1L                  | KH homology domain containing 1-like                                                                      | -0.71                 |
| ABHD12B                 | abhydrolase domain containing 12B                                                                         | -0.69                 |
| CDR1as                  | circular RNA CDR1as                                                                                       | -0.68                 |
| KHDC1                   | KH homology domain containing 1                                                                           | -0.68                 |
| HTN1                    | histatin 1                                                                                                | -0.66                 |
| KRIT1                   | KRIT1. ankyrin repeat containing                                                                          | -0.69                 |
| IL12A                   | interleukin 12A (natural killer cell stimulatory factor 1. cytotoxic lymphocyte maturation factor 1. p35) | -0.65                 |
| FASLG                   | Fas ligand (TNF superfamily. member 6)                                                                    | -0.64                 |
| FGF18                   | fibroblast growth factor 18                                                                               | -0.64                 |
| CCL1                    | chemokine (C-C motif) ligand 1                                                                            | -0.64                 |
| CALCB                   | calcitonin-related polypeptide beta                                                                       | -0.57                 |
| GPR64                   | G protein-coupled receptor 64                                                                             | -0.55                 |
| AIM1L                   | absent in melanoma 1-like                                                                                 | -0.55                 |
| MTPN                    | myotrophin                                                                                                | -0.54                 |
| PLEKHA1                 | pleckstrin homology domain containing. family A (phosphoinositide binding specific) member 1              | -0.54                 |
| RIOK1                   | RIO kinase 1                                                                                              | -0.52                 |
| RSAD2                   | radical S-adenosyl methionine domain containing 2                                                         | -0.52                 |
| TRAPPC2                 | trafficking protein particle complex 2                                                                    | -0.53                 |
| ATXN10                  | ataxin 10                                                                                                 | -0.57                 |
| LUM                     | lumican                                                                                                   | -0.51                 |
| RPL36A                  | ribosomal protein L36a                                                                                    | -0.51                 |
| SCML2                   | sex comb on midleg-like 2 (Drosophila)                                                                    | -0.51                 |
| ALDH1A1                 | aldehyde dehydrogenase 1 family. member A1                                                                | -0.51                 |
| YOD1                    | YOD1 deubiquitinase                                                                                       | -0.75                 |
| PELI1                   | pellino E3 ubiquitin protein ligase 1                                                                     | -0.5                  |
| ANGPTL5                 | angiopoietin-like 5                                                                                       | -0.49                 |
| TGFB1                   | transforming growth factor. beta-induced. 68kDa                                                           | -0.52                 |
| ARMCX1                  | armadillo repeat containing. X-linked 1                                                                   | -0.49                 |

|          |                                                                   |       |
|----------|-------------------------------------------------------------------|-------|
| B3GAT2   | beta-1.3-glucuronyltransferase 2 (glucuronosyltransferase S)      | -0.70 |
| MATN2    | matrilin 2                                                        | -0.48 |
| HSD17B4  | hydroxysteroid (17-beta) dehydrogenase 4                          | -0.49 |
| SKP2     | S-phase kinase-associated protein 2. E3 ubiquitin protein ligase  | -0.47 |
| CDK2AP1  | cyclin-dependent kinase 2 associated protein 1                    | -0.47 |
| NTF3     | neurotrophin 3                                                    | -0.47 |
| MRPL9    | mitochondrial ribosomal protein L9                                | -0.47 |
| SPDYA    | speedy/RINGO cell cycle regulator family member A                 | -0.46 |
| TIMP3    | TIMP metalloproteinase inhibitor 3                                | -0.68 |
| BEST3    | bestrophin 3                                                      | -0.49 |
| SMAD7    | SMAD family member 7                                              | -0.46 |
| MCMDC2   | minichromosome maintenance domain containing 2                    | -0.46 |
| MSH2     | mutS homolog 2                                                    | -0.46 |
| SC5D     | sterol-C5-desaturase                                              | -0.46 |
| EIF1AX   | eukaryotic translation initiation factor 1A. X-linked             | -0.46 |
| SEPT10   | septin 10                                                         | -0.45 |
| RNFT1    | ring finger protein. transmembrane 1                              | -0.45 |
| SATB1    | SATB homeobox 1                                                   | -0.55 |
| PHF14    | PHD finger protein 14                                             | -0.58 |
| FAM13A   | family with sequence similarity 13. member A                      | -0.44 |
| VSNL1    | visinin-like 1                                                    | -0.44 |
| RP2      | retinitis pigmentosa 2 (X-linked recessive)                       | -0.44 |
| RTN4     | reticulon 4                                                       | -0.43 |
| LZTFL1   | leucine zipper transcription factor-like 1                        | -0.43 |
| C9orf38  | chromosome 9 open reading frame 38                                | -0.43 |
| HNMT     | histamine N-methyltransferase                                     | -0.43 |
| ARHGAP24 | Rho GTPase activating protein 24                                  | -0.43 |
| UBE2D3   | ubiquitin-conjugating enzyme E2D 3                                | -0.51 |
| PPP1R3B  | protein phosphatase 1. regulatory subunit 3B                      | -0.42 |
| LRRC57   | leucine rich repeat containing 57                                 | -0.42 |
| DUSP8    | dual specificity phosphatase 8                                    | -0.49 |
| PDCD4    | programmed cell death 4 (neoplastic transformation inhibitor)     | -0.5  |
| PPP1R3D  | protein phosphatase 1. regulatory subunit 3D                      | -0.42 |
| TPRG1L   | tumor protein p63 regulated 1-like                                | -0.45 |
| SOX5     | SRY (sex determining region Y)-box 5                              | -0.43 |
| KBTD7    | kelch repeat and BTB (POZ) domain containing 7                    | -0.42 |
| RMND5A   | required for meiotic nuclear division 5 homolog A (S. cerevisiae) | -0.41 |
| BRCC3    | BRCA1/BRCA2-containing complex. subunit 3                         | -0.41 |

|          |                                                                       |       |
|----------|-----------------------------------------------------------------------|-------|
| RAB22A   | RAB22A. member RAS oncogene family                                    | -0.54 |
| PDZD8    | PDZ domain containing 8                                               | -0.48 |
| PDLIM5   | PDZ and LIM domain 5                                                  | -0.41 |
| OLR1     | oxidized low density lipoprotein (lectin-like) receptor 1             | -0.54 |
| SLC2A4RG | SLC2A4 regulator                                                      | -0.48 |
| SPRY1    | sprouty homolog 1. antagonist of FGF signaling (Drosophila)           | -0.41 |
| RASGRP1  | RAS guanyl releasing protein 1 (calcium and DAG-regulated)            | -0.40 |
| PFKM     | phosphofructokinase. muscle                                           | -0.40 |
| S100A10  | S100 calcium binding protein A10                                      | -0.40 |
| RALGPS2  | Ral GEF with PH domain and SH3 binding motif 2                        | -0.51 |
| TSPO     | translocator protein (18kDa)                                          | -0.40 |
| GLIS2    | GLIS family zinc finger 2                                             | -0.39 |
| KLF5     | Kruppel-like factor 5 (intestinal)                                    | -0.39 |
| TEX12    | testis expressed 12                                                   | -0.39 |
| FAM177B  | family with sequence similarity 177. member B                         | -0.39 |
| BRWD1    | bromodomain and WD repeat domain containing 1                         | -0.57 |
| SPATA5L1 | spermatogenesis associated 5-like 1                                   | -0.39 |
| CCDC121  | coiled-coil domain containing 121                                     | -0.39 |
| TMEM68   | transmembrane protein 68                                              | -0.42 |
| PDAP1    | PDGFA associated protein 1                                            | -0.40 |
| SPRY2    | sprouty homolog 2 (Drosophila)                                        | -0.39 |
| ELF2     | E74-like factor 2 (ets domain transcription factor)                   | -0.38 |
| RECK     | reversion-inducing-cysteine-rich protein with kazal motifs            | -0.38 |
| PCBP1    | poly(rC) binding protein 1                                            | -0.38 |
| C7       | complement component 7                                                | -0.39 |
| CLDN8    | claudin 8                                                             | -0.38 |
| FNIP2    | folliculin interacting protein 2                                      | -0.38 |
| TGM4     | transglutaminase 4                                                    | -0.38 |
| SLC16A10 | solute carrier family 16 (aromatic amino acid transporter). member 10 | -0.64 |
| ST3GAL6  | ST3 beta-galactoside alpha-2,3-sialyltransferase 6                    | -0.74 |
| RNF32    | ring finger protein 32                                                | -0.37 |
| ZNF728   | zinc finger protein 728                                               | -0.37 |

Release 7.2: March 2018

**A**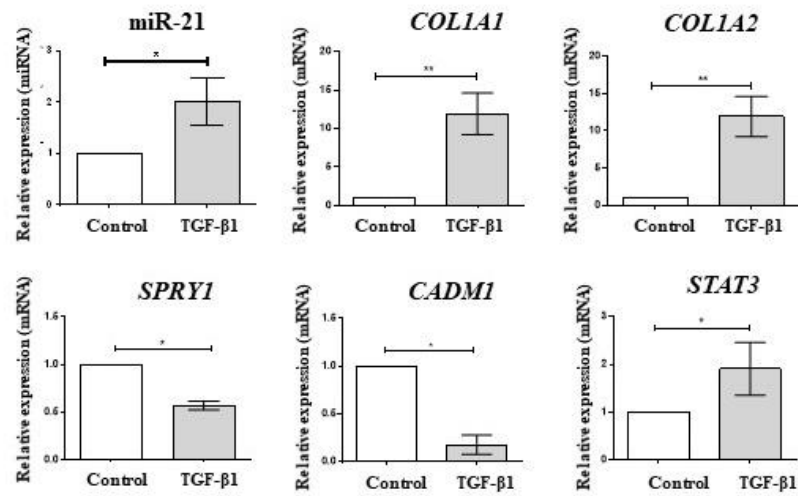**B**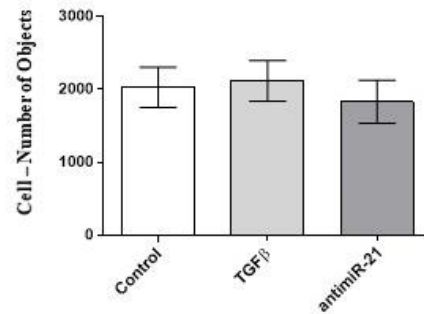

**Figure S1 - MiR-21 and mRNA expression in human cardiac fibroblasts.** (A) MiR-21, *COL1A1*, *COL1A2*, *SPRY1*, *CADM1*, and *STAT3* expression levels 24h after stimulation with TGF-β1, measured by RT-qPCR (Fold Change to non-stimulated control), miRNA was normalized to miR-423-3p and mRNA were normalized to *HPRT/GAPDH*. (B) Evaluation of cell viability by propidium iodide (PI) staining in cells treated with LNA antimir-21 for 24 h. Results are expressed as mean ± SEM of three independent experiments. (A) \* $p < 0.05$ , \*\* $p < 0.01$ , Student's *t*-test.

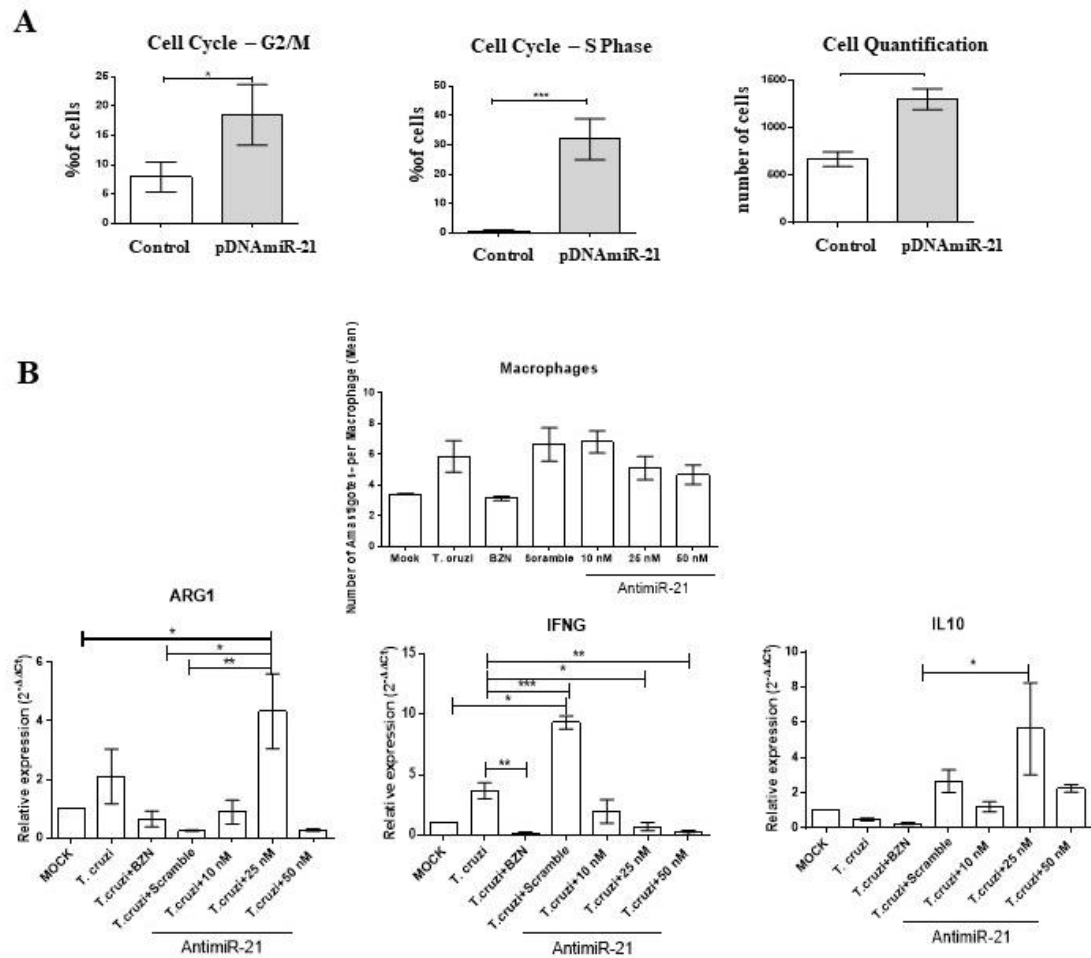

**Figure S2 - MiR-21 increases proliferation of cardiac fibroblasts and *T. cruzi* infection in macrophages.** (A) Cell cycle analysis in EDU and Hoeschst stained cells evaluated using Operetta HCT. Percentage of cells in G2/M (high DNA content) and S phases, and total cell numbers. (B) The mRNA expression of *Arg1*, *Ifny* and *Il10* in murine macrophages after *T. cruzi* infection and treated with LNA-antimiR-21. Data represent the mean  $\pm$  SEM of three independent experiments, ANOVA, \* $p < 0.05$ , \*\* $p < 0.01$ , \*\*\* $p < 0.001$ .

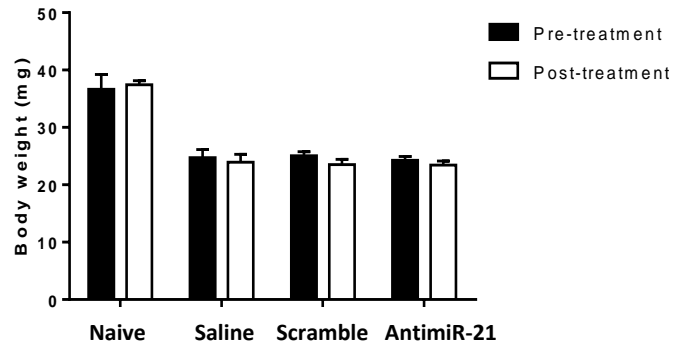

**Figure S3 - Evaluation of LNA-anti-miR-21 inhibitor treatment in chronic Chagas disease model.** Body weight measures before and after treatments. Data are represented as mean  $\pm$  SEM, n=8 per group. ANOVA with Bonferroni comparisons.
